# Supplementary material for: Effective Peroxidase-Like Activity of Co-Aminoclay [CoAC] and Its Application for Glucose Detection
Source: MDPI journal article supplement (doi:10.3390/s18020457), 2018-02-03
Supplement: s1 [file s1]

## Supporting Information

**Table S1.** Polydispersity index (PDI) of ACs

| Aminoclay | PDI   |
|-----------|-------|
| FeAC      | 0.253 |
| CuAC      | 0.247 |
| CoAC      | 0.231 |
| ZnAC      | 0.344 |
| NiAC      | 0.381 |
| CeAC      | 0.336 |
| MnAC      | 0.444 |

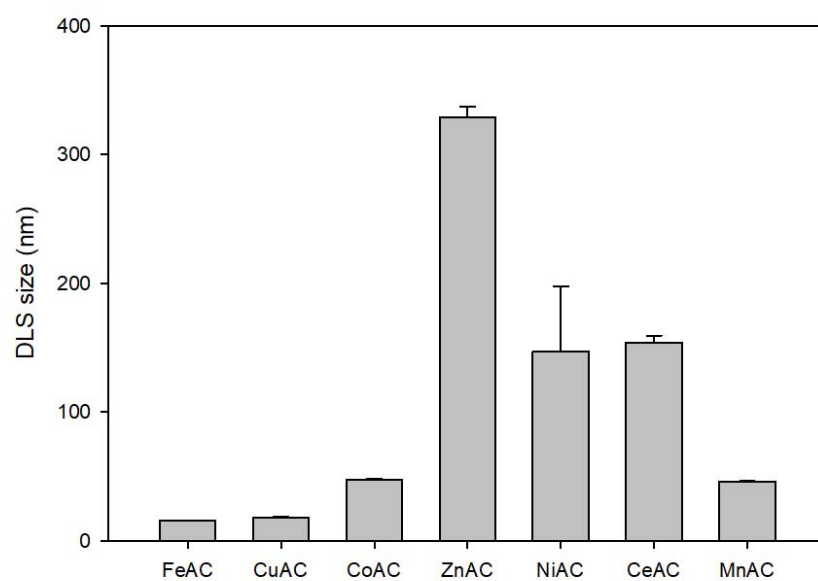

**Figure S1.** The size distribution of ACs

**CoAC**

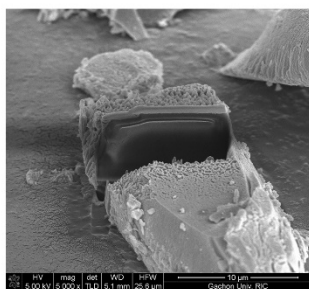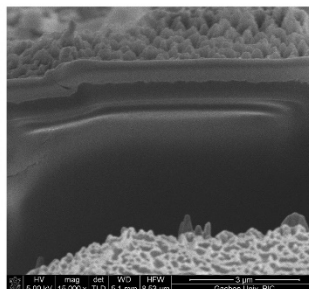

**CeAC**

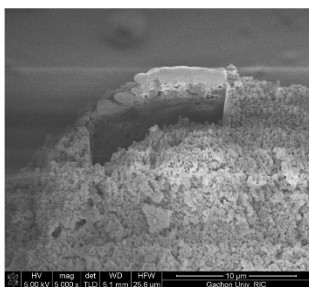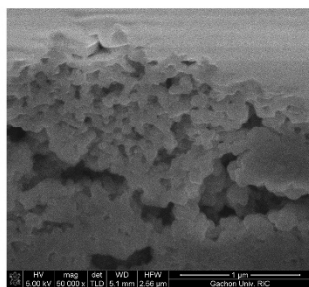

**MnAC**

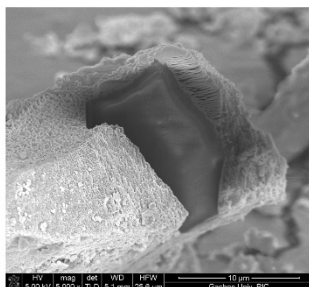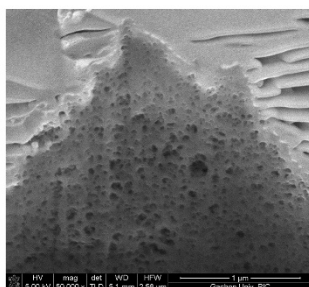

**Figure S2.** Focus ion beam scanning electron microscope (FIB-SEM) images of ACs

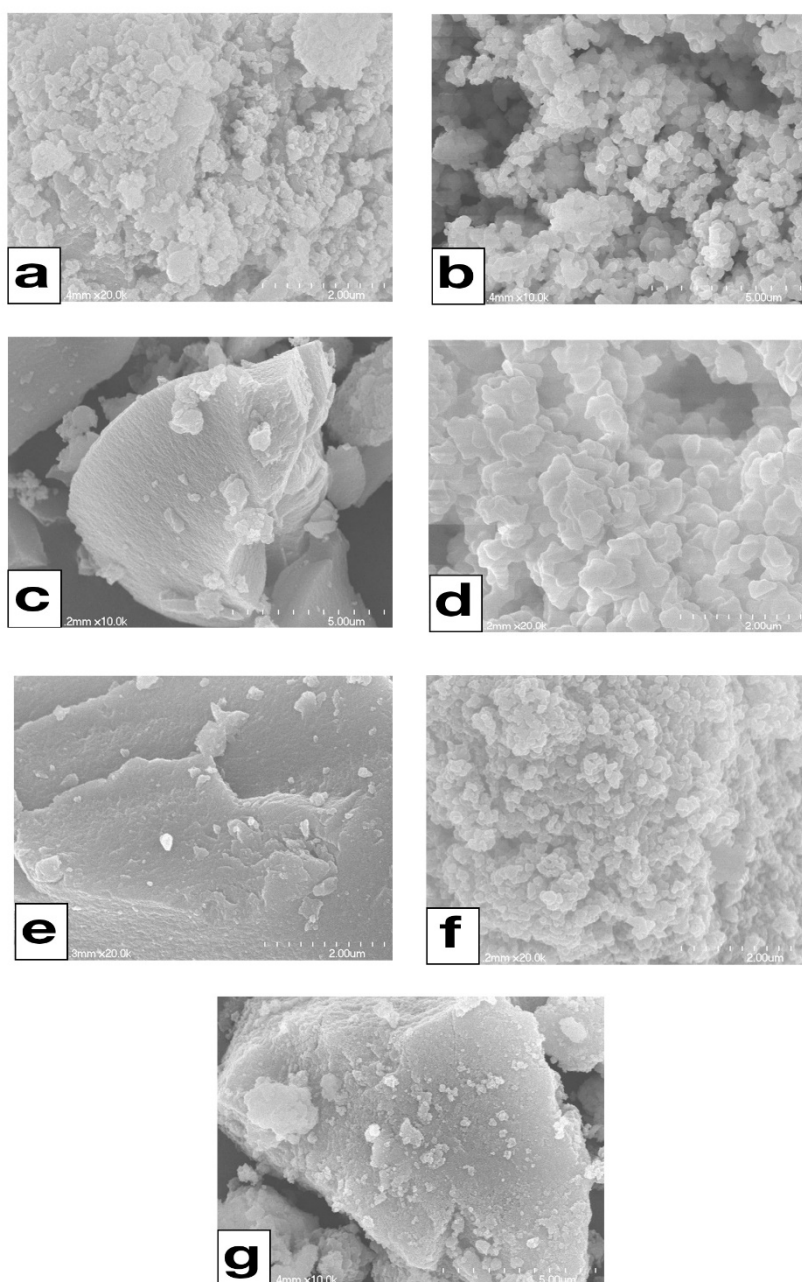

**Figure S3.** Scanning electron microscope (SEM) images of FeAC (a), CuAC (b), CoAC (c), ZnAC (d), NiAC (e), CeAC (f), and MnAC (g).

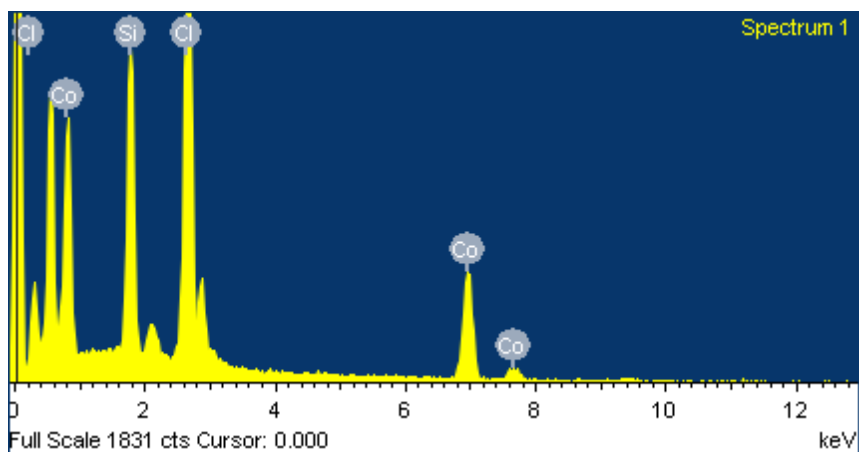

| Element | Weight% | Atomic% |
|---------|---------|---------|
| Si K    | 18.10   | 26.48   |
| Cl K    | 35.52   | 41.17   |
| Co K    | 46.39   | 32.35   |
| Totals  | 100.00  |         |

**Figure S4.** Energy-dispersive X-ray (EDX) data of CoAC

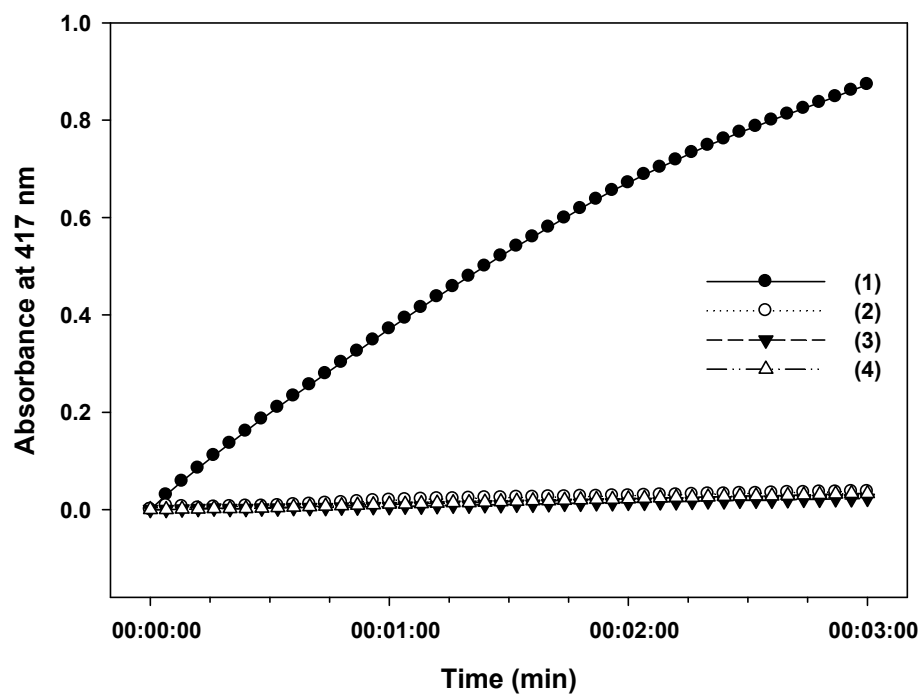

**Figure S5.** Time-dependent absorbance changes at 417nm. Sample specifications are as follows. 1) CoAC with  $\text{H}_2\text{O}_2$ , 2), 3), and 4) represent the reactions containing  $\text{CoCl}_2$  (10%, 20%, and 30% compared to the concentration of CoAC, respectively) with  $\text{H}_2\text{O}_2$ .

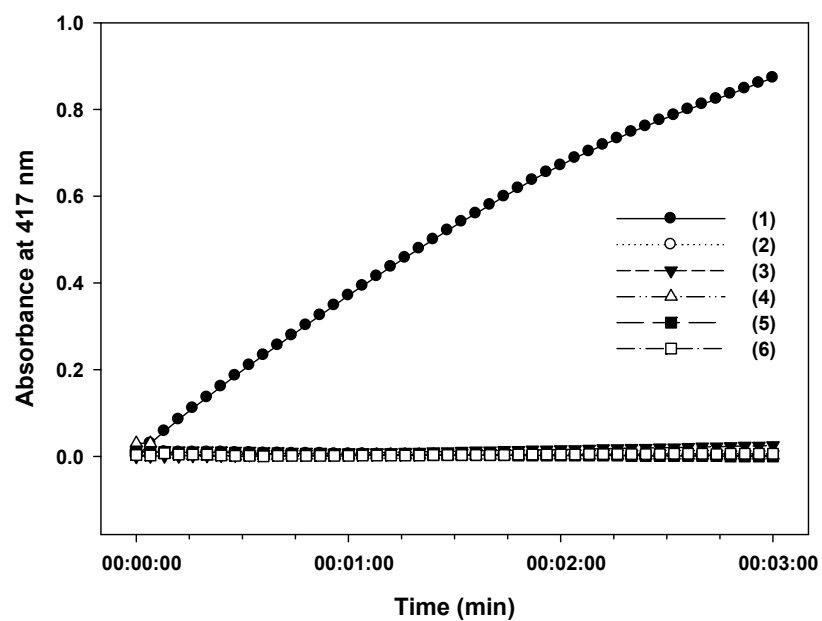

**Figure S6.** Time-dependent absorbance changes at 417 nm. Sample specifications are as follows. 1) CoAC with  $H_2O_2$ , 2), 3), 4), 5), and 6) represent the reactions containing supernatant solutions after incubating CoAC for 1 hour in five different buffers (pH 2, 4, 6, 8, and 10 with 0.1 M Tris-acetate, respectively) with  $H_2O_2$ .
